# Supplementary material for: Assessment of Satisfaction with Pharmacist-Administered COVID-19 Vaccinations in France: PharmaCoVax
Source: MDPI journal article supplement (doi:10.3390/vaccines10030440), 2022-03-14
Supplement: s1 [file s1]

## Supplementary Material—Networks involved in distributing the study

Networks involved in the PharmaCoVax study:

- The Regional Unions of Health Professionals (*Union régionale des professionnels de santé*).
- The French-speaking Society of Medicinal Pharmaceutical Sciences (*Société Francophone des Sciences Pharmaceutiques Officinales*).
- The College of Consultant Pharmacists and Training Supervisors (*Collège des Pharmaciens Conseillers et Maîtres de Stage*).
- Federation of pharmaceutical unions of France (*Fédération des Syndicats Pharmaceutiques de France* – FSPF, first union).
- Association of pharmacists' unions (*Union des Syndicats de Pharmaciens d'Officine* – USPO, second union).
